# Supplementary material for: NRF‐2/HO‐1 Pathway‐Mediated SHOX2 Activation Is a Key Switch for Heart Rate Acceleration by Yixin‐Fumai Granules
Source: Hindawi journal article supplement (doi:10.1155/2022/8488269), 2022-01-01
Supplement: f1 [file 8488269.f1.zip]

# Cardiomyocytes CERTIFICATE OF ANALYSIS

PRODUCT: Custom Service  
NOTE: H-7  
DATE OF REPORT: 10. Jan. 2022

## PRODUCT DESCRIPTION

Cardiomyocytes are human iPSC-derived cardiomyocytes suitable for drug screening, toxicity evaluation and other *in vitro* applications.

### Viability

| TEST DESCRIPTION   | SPECIFICATION              | RESULT                                     |
|--------------------|----------------------------|--------------------------------------------|
| Cell Number        | $\geq 2 \times 10^6$ cells | <b><math>2.18 \times 10^6</math> cells</b> |
| Post-Thaw Recovery | >70% adhere                | <b>Pass</b>                                |

### Sterility

| TEST DESCRIPTION       | SPECIFICATION | RESULT      |
|------------------------|---------------|-------------|
| Bacteria               | Negative      | <b>Pass</b> |
| Fungi (Yeast and Mold) | Negative      | <b>Pass</b> |
| Mycoplasma             | Negative      | <b>Pass</b> |

### Characterization

| PLURIPOTENCY MARKERS      | SPECIFICATION | RESULT       |
|---------------------------|---------------|--------------|
| Cardiac Troponin T (cTnT) | >70% cTnT     | <b>97.8%</b> |

### Brightfield

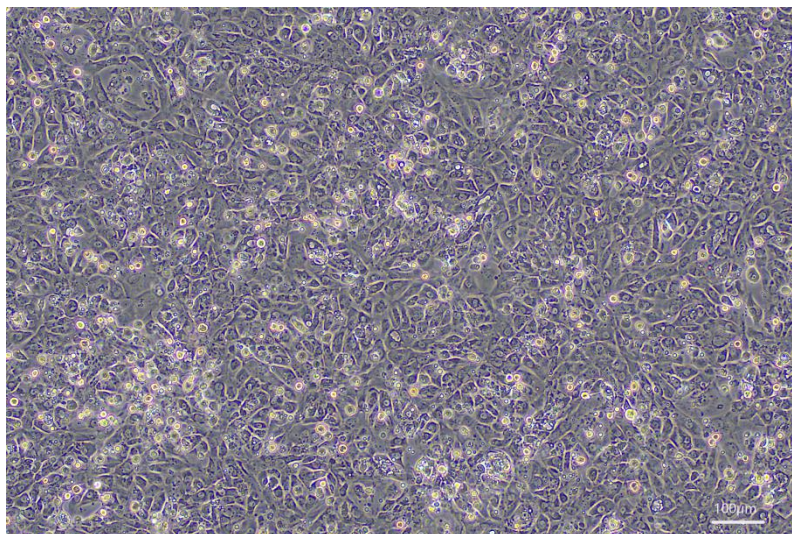

Scale bar 100um

## Flow cytometry analysis of cardiomyocyte marker cTnT and MLC-2a expression in Cardiomyocytes.

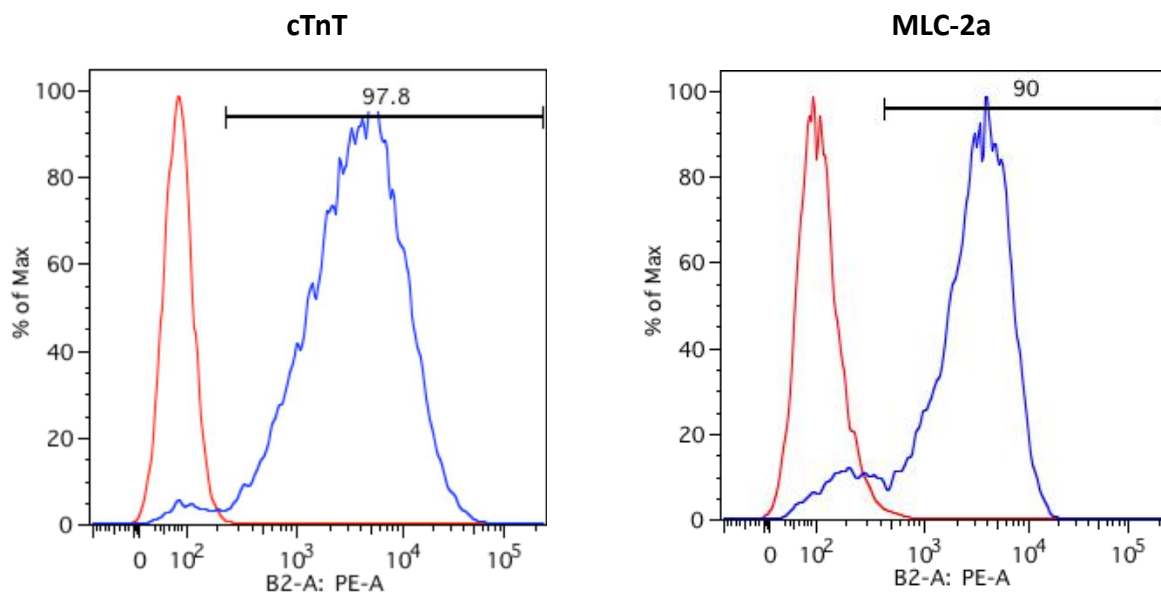

## Immunofluorescence analysis of cTnT expression in Cardiomyocytes.

Cardiomyocytes were labeled for cTnT(Red). Nuclei were labeled with DAPI (Blue).

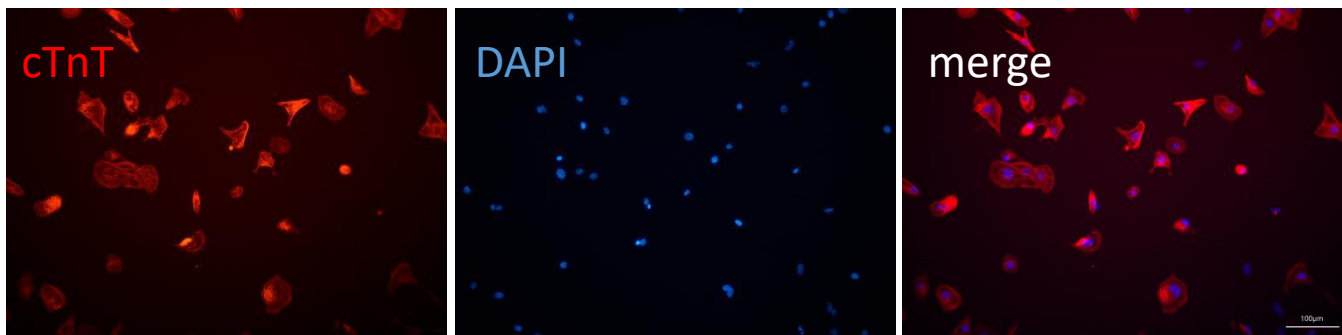

Scale bar 100um
