# Supplementary material for: NRF-2/HO-1 Pathway-Mediated SHOX2 Activation Is a Key Switch for Heart Rate Acceleration by Yixin-Fumai Granules
Source: Oxid Med Cell Longev. 2022 Sep 26;2022:8488269. doi: 10.1155/2022/8488269 (PMC9529460; doi:10.1155/2022/8488269)
Supplement: Supplementary Materials — Supplementary files contains editorial certificate and analysis certificate for references. [file 8488269.f1.zip]

Archive with 2 entries (2 files):
- Analysis certificate (1).pdf
- Editorial certificate (1).pdf
